# Supplementary material for: C-stage in Colon Cancer: Implications of Carcinoembryonic Antigen Biomarker in Staging, Prognosis, and Management
Source: Oxford University Press journal article supplement (doi:10.1093/jnci/djr078), 2011-03-01
Supplement: 998202_Supplementary_Data.zip [file 998202_Supplementary_Data.zip]

Archive with 1 entries (1 files):
- jnci-JNCI-10-1006-s01.pdf
