# Supplementary material for: C-stage in Colon Cancer: Implications of Carcinoembryonic Antigen Biomarker in Staging, Prognosis, and Management
Source: Oxford University Press journal article supplement (doi:10.1093/jnci/djr078), 2011-03-01
Supplement: 998202_Supplementary_Data.zip [file 998202_Supplementary_Data.zip › jnci-JNCI-10-1006-s01.pdf]

**Supplementary Table 1.** Independent prognostic factors for colonic adenocarcinoma for  
AJCC stages I–III

| Covariate          | Reference             | Variable                    | Overall Mortality * |       |       |
|--------------------|-----------------------|-----------------------------|---------------------|-------|-------|
|                    |                       |                             | HR (95% CI)         | SE    | P†    |
| Age                | (Continuous variable) |                             | 1.06 (1.05 to 1.06) | 0.003 | <.001 |
| Race               | White                 | Black                       | 1.16 (0.96 to 1.41) | 0.10  | .12   |
|                    |                       | Other                       | 0.80 (0.63 to 1.01) | 0.12  | .06   |
| Site               | Cecum                 | Ascending colon             | 0.93 (0.79 to 1.10) | 0.09  | .42   |
|                    |                       | Descending colon            | 1.03 (0.79 to 1.35) | 0.14  | .84   |
|                    |                       | Hepatic flexure of colon    | 1.41 (1.11 to 1.79) | 0.12  | .005  |
|                    |                       | Overlapping lesion of colon | 1.20 (0.79 to 1.84) | 0.22  | .40   |
|                    |                       | Sigmoid colon               | 1.05 (0.89 to 1.23) | 0.08  | .57   |
|                    |                       | Splenic flexure of colon    | 1.18 (0.89 to 1.56) | 0.14  | .25   |
|                    |                       | Transverse colon            | 1.19 (0.97 to 1.45) | 0.10  | .10   |
| C-stage            | C0-stage              | C1-stage                    | 1.59 (1.42 to 1.79) | 0.06  | <.001 |
| Histological Grade | Well-Differentiated   | Moderately differentiated   | 1.23 (0.97 to 1.56) | 0.12  | .09   |
|                    |                       | Poorly differentiated       | 1.50 (1.16 to 1.93) | 0.13  | .002  |
|                    |                       | Undifferentiated            | 1.52 (0.95 to 2.44) | 0.24  | .08   |
| AJCC stage         | Stage I               | IIA                         | 1.17 (0.96 to 1.42) | 0.10  | .12   |
|                    |                       | IIB                         | 2.06 (1.50 to 2.84) | 0.16  | <.001 |
|                    |                       | IIC                         | 2.20 (1.55 to 3.11) | 0.18  | <.001 |

|                |                        |                    |                     |      |       |
|----------------|------------------------|--------------------|---------------------|------|-------|
|                |                        | IIIA               | 1.11 (0.75 to 1.66) | 0.20 | .60   |
|                |                        | IIIB               | 1.92 (1.58 to 2.33) | 0.10 | <.001 |
|                |                        | IIIC               | 4.07 (3.26 to 5.08) | 0.11 | <.001 |
| Radiation      | None                   | Performed          | 1.19 (0.80 to 1.77) | 0.20 | .39   |
| Surgery        | None                   | Local excision     | 0.36 (0.16 to 0.81) | 0.41 | .01   |
|                |                        | Surgical resection | 0.18 (0.12 to 0.27) | 0.22 | <.001 |
| Marital Status | Single (never married) | Estranged          | 0.76 (0.59 to 0.97) | 0.13 | .03   |
|                |                        | Married            | 0.59 (0.50 to 0.71) | 0.09 | <.001 |
|                |                        | Widowed            | 0.65 (0.53 to 0.79) | 0.10 | <.001 |

\* Multivariable analysis using Cox proportional hazards model of all independent prognostic factors affecting overall mortality at median follow-up of 27 months among AJCC stage I – III patients, diagnosed in 2004 in the SEER17 registries, after application of inclusion and exclusion criteria (n = 6,644). Models were stratified by radiation therapy covariate. The registry in which the patient was registered was also used as a covariate. None of the SEER 17 registries emerged as an independent prognostic factor ( $P > .05$ ). HR = Hazard Ratio; CI = Confidence Interval; SE = Standard Error; SEER = Surveillance, Epidemiology and End Results; AJCC = American Joint Committee on Cancer; C0-stage = normal carcinoembryonic antigen level; C1-stage = elevated carcinoembryonic antigen level. Numbers may not equal the sample size of the final analytic cohort because of missing data on some of the covariates.

† Two-sided  $P$  values were calculated using log-rank test.

‡ Per AJCC Staging Manual (7<sup>th</sup> edition, 2010) (1).

**Supplementary Table 2.** Multivariable analysis to identify independent prognostic factors  
for colonic adenocarcinoma, using availability of C-stage information as one of the covariates

| Covariate          | Reference             | Variable                  | Overall Mortality * |       |       |
|--------------------|-----------------------|---------------------------|---------------------|-------|-------|
|                    |                       |                           | HR (95% CI)         | SE    | P †   |
| Age                | (Continuous variable) |                           | 1.04 (1.04 to 1.04) | 0.001 | <.001 |
| Race               | White                 | Black                     | 1.12 (1.02 to 1.24) | 0.05  | .02   |
|                    |                       | Other                     | 0.96 (0.84 to 1.10) | 0.07  | .59   |
| Origin             | Non-Hispanic          | Hispanic                  | 1.05 (0.93 to 1.18) | 0.06  | .43   |
| Site               | Cecum                 | Ascending colon           | 0.91 (0.83 to 0.99) | 0.05  | .04   |
|                    |                       | Descending colon          | 0.95 (0.83 to 1.09) | 0.07  | .46   |
|                    |                       | Hepatic flexure           | 1.10 (0.96 to 1.25) | 0.07  | .18   |
|                    |                       | Overlapping lesion        | 1.24 (1.03 to 1.49) | 0.09  | .02   |
|                    |                       | Sigmoid colon             | 0.84 (0.78 to 0.91) | 0.04  | <.001 |
|                    |                       | Splenic flexure           | 1.04 (0.90 to 1.21) | 0.08  | .58   |
|                    |                       | Transverse colon          | 1.10 (0.99 to 1.23) | 0.06  | .08   |
| C-stage            | Not available         | Available                 | 0.88 (0.83 to 0.93) | 0.03  | <.001 |
| Histological Grade | Well-Differentiated   | Moderately differentiated | 1.26 (1.11 to 1.43) | 0.07  | <.001 |
|                    |                       | Poorly differentiated     | 1.73 (1.51 to 1.98) | 0.07  | <.001 |
|                    |                       | Undifferentiated          | 1.20 (1.57 to 2.54) | 0.12  | <.001 |
| AJCC Staging ‡     | Stage I               | IIA                       | 1.35 (1.19 to 1.53) | 0.07  | <.001 |
|                    |                       | IIB                       | 2.43 (1.96 to 3.02) | 0.11  | <.001 |
|                    |                       | IIC                       | 3.15 (2.53 to 3.92) | 0.11  | <.001 |
|                    |                       | IIIA                      | 1.13 (0.86 to 1.50) | 0.14  | .39   |
|                    |                       | IIIB                      | 2.12 (1.87 to 2.41) | 0.07  | <.001 |
|                    |                       | IIIC                      | 4.59 (3.97 to 5.31) | 0.07  | <.001 |

| Covariate              | Reference              | Variable                       | Overall Mortality *   |      |       |
|------------------------|------------------------|--------------------------------|-----------------------|------|-------|
|                        |                        |                                | HR (95% CI)           | SE   | P †   |
|                        |                        | IV                             | 10.42 (9.28 to 11.70) | 0.06 | <.001 |
| Surgery                | None                   | Local excision                 | 0.51 (0.38 to 0.70)   | 0.16 | <.001 |
|                        |                        | Surgical resection             | 0.41 (0.37 to 0.45)   | 0.05 | <.001 |
| Marital Status         | Single (never married) | Separated                      | 0.88 (0.77 to 0.99)   | 0.06 | .04   |
|                        |                        | Married                        | 0.70 (0.64 to 0.77)   | 0.05 | <.001 |
|                        |                        | Widowed                        | 0.79 (0.71 to 0.88)   | 0.05 | <.001 |
| Regional SEER Registry | Alaska Natives         | Atlanta (Metropolitan)         | 1.79 (0.57 to 5.68)   | 0.59 | .32   |
|                        |                        | California excluding SF/SJM/LA | 1.72 (0.55 to 5.38)   | 0.58 | .35   |
|                        |                        | Connecticut                    | 1.45 (0.46 to 4.56)   | 0.59 | .53   |
|                        |                        | Detroit (Metropolitan)         | 1.76 (0.56 to 5.53)   | 0.59 | .34   |
|                        |                        | Hawaii                         | 1.48 (0.47 to 4.69)   | 0.59 | .51   |
|                        |                        | Iowa                           | 1.60 (0.51 to 5.02)   | 0.59 | .43   |
|                        |                        | Kentucky                       | 2.09 (0.67 to 6.57)   | 0.58 | .21   |
|                        |                        | Los Angeles                    | 1.72 (0.55 to 5.38)   | 0.58 | .35   |
|                        |                        | Louisiana                      | 1.98 (0.63 to 6.21)   | 0.58 | .24   |
|                        |                        | New Jersey                     | 1.61 (0.51 to 5.05)   | 0.58 | .41   |
|                        |                        | New Mexico                     | 1.63 (0.51 to 5.19)   | 0.59 | .41   |
|                        |                        | Rural Georgia                  | 1.27 (0.34 to 4.74)   | 0.67 | .72   |
|                        |                        | San Francisco to Oakland SMSA  | 1.60 (0.51 to 5.02)   | 0.58 | .42   |
|                        |                        | San Jose - Monterey            | 1.13 (0.35 to 3.59)   | 0.59 | .84   |
|                        |                        | Seattle (Puget - Sound)        | 1.69 (0.54 to 5.31)   | 0.59 | .37   |
|                        |                        | Utah                           | 1.98 (0.62 to 6.32)   | 0.59 | .25   |

\* Multivariable analysis using Cox proportional hazards model of all independent prognostic factors affecting overall mortality at median follow-up of 27 months for all patients diagnosed in 2004 in the SEER 17 registries, after application of inclusion and exclusion criteria (N = 17,910 patients), including those with unavailable C-stage information (n = 8827 patients). Models were stratified by radiation therapy covariate. The registry in which the patient was registered was also used as a covariate. Numbers may not equal the sample size of the final analytic cohort because of missing data on some of the covariates. HR = Hazard Ratio; CI = Confidence Interval; SE = Standard Error; SEER = Surveillance, Epidemiology and End Results. AJCC = American Joint Committee on Cancer, SF = San Francisco, SJM = San Jose Monterey, LA = Los Angeles; SMSA = Standard Metropolitan Statistical Area.

† Two-sided *P* values were calculated using log-rank test.

‡ Per AJCC Staging Manual (7<sup>th</sup> edition, 2010) (1).

## Reference

1. Edge SB, Byrd DR, Compton CC ea. American Joint Committee on Cancer Cancer Staging Manual, 7th ed, (Eds), Springer, New York 2010.
